## Effects of Interpleural Bupivacaine on Respiratory Muscle Strength and Pulmonary Function

Lluís Gallart, M.D.,\* Joaquim Gea, M.D., Ph.D.,† M. Carmen Aguar, M.D.,‡  
Joan M. Broquetas, M.D., Ph.D.,§ Margarita M. Puig, M.D., Ph.D.||

**Background:** Several reports suggest that interpleural local anesthetics may have deleterious effects on respiratory function. The current study investigated the effects of interpleural bupivacaine on human respiratory muscles and lung function.

**Methods:** Thirteen patients ( $55 \pm 4$  yr old) with normal respiratory function and scheduled for cholecystectomy entered the study before surgery. Respiratory parameters were compared before and after the interpleural administration of 20 ml 0.5% bupivacaine plus 1:200,000 epinephrine while patients were supine; we evaluated breathing pattern, dynamic and static lung volumes, airway conductance, maximal inspiratory pressures (at the mouth; at the esophagus [ $P_{es,sniff}$ ]; at the abdomen [ $P_{ga,sniff}$ ]; and transdiaphragmatic [ $P_{di,sniff}$ ]), functional reserve (tension-time index) of the diaphragm, and maximal expiratory pressures (at the mouth; at the esophagus [ $P_{es,cough}$ ]; and at the abdomen [ $P_{ga,cough}$ ]). Hemoglobin oxygen saturation by pulse oximetry, heart rate, and mean arterial pressure were continuously monitored.

**Results:** Respiratory rate ( $15 \pm 1$  to  $19 \pm 1$  breaths/min;  $P < 0.01$ ) and heart rate ( $78 \pm 3$  to  $83 \pm 3$  beats/min;  $P < 0.01$ ) were slightly increased. Dynamic and static lung volumes, airway conductance, hemoglobin saturation, and the remaining breathing pattern parameters were unchanged. Regarding respiratory muscles, maximal inspiratory pressure at the mouth,  $P_{es,sniff}$ , and tension-time index of the diaphragm did not change.  $P_{di,sniff}$  decreased slightly ( $102 \pm 10$  to  $92 \pm 10$  cmH<sub>2</sub>O;  $P < 0.05$ ) because of a change in  $P_{ga,sniff}$  ( $24.2 \pm 7.4$  to  $18.4 \pm 6.8$  cmH<sub>2</sub>O;  $P < 0.05$ ). Maximal expiratory pressure at the mouth remained unaltered, but  $P_{ga,cough}$  decreased ( $108 \pm$

$10$  to  $92 \pm 8$  cmH<sub>2</sub>O;  $P < 0.01$ ), and  $P_{es,cough}$  showed a trend to decrease ( $92 \pm 13$  to  $78 \pm 10$  cmH<sub>2</sub>O;  $P = 0.074$ ).

**Conclusions:** In our experimental conditions, interpleural bupivacaine did not significantly change lung function or inspiratory muscle strength but induced a slight decrease in abdominal muscle strength. Although this effect was minimal, its clinical relevance needs to be evaluated further in patients with impaired respiratory function. (Key words: Anesthetics, local: bupivacaine. Anesthetic techniques: interpleural. Muscles, respiratory: physiology. Respiration: function tests.)

INTERPLEURAL local anesthetics produce sensory blockade of the hemithorax and superior hemiabdomen. However, the extent and characteristics of the motor blockade and the effects on respiratory function have not been clearly established. The block may affect muscles innervated by thoracic nerves, including the external intercostal muscles, used during inspiration, and the internal intercostal and abdominal muscles, which are the main expiratory muscles.<sup>1</sup> On the other hand, the diaphragm, which is the main inspiratory muscle, is less likely to be blocked because the phrenic nerve travels in the mediastinum, remote from the posterior rib cage, where local anesthetics are located when administered with the patient supine.<sup>2</sup> However, a large part of the surface of the diaphragm is in apposition with the lower rib cage<sup>1</sup>; in this area, the muscle or the terminal branches of the phrenic nerve may be blocked by local anesthetics. Therefore, both inspiratory and expiratory muscles may be affected by interpleural anesthetics.

Studies in animals have shown that interpleural anesthetics induce blockade of the intercostal nerves<sup>3</sup> and dramatically decrease the electromyographic activity of the diaphragm.<sup>4</sup> It has also been reported that in humans, interpleural anesthetics can occasionally result in unilateral bronchospasm<sup>5</sup> or phrenic nerve paralysis.<sup>6</sup>

However, no studies have been specifically designed or performed to investigate the effects of interpleural anesthetics on respiratory muscle strength and pul-

\* Attending Physician, Anesthesiology.

† Head of Section, Pneumology.

‡ Predoctoral Fellow, Pneumology.

§ Chief of Service, Pneumology.

|| Professor and Chair, Anesthesiology.

Received from the Department of Anesthesiology and the Department of Pneumology, Hospital Universitari del Mar and Institut Municipal d'Investigació Mèdica (IMIM), Barcelona, Spain. Submitted for publication June 8, 1994. Accepted for publication March 21, 1995. Presented in part at the meeting of the European Society of Anesthesiologists, Brussels, Belgium, February 9-12, 1994.

Address reprint requests to Dr. Gallart: Servei d'Anestesiologia, Hospital Universitari del Mar, Passeig Marítim 25, 08003 Barcelona, Spain.

Fig. 1. Sequence of the study. BP = breathing pattern; FS = forced spirometry (dynamic lung volumes); DLCO = carbon monoxide diffusion; SLV = static lung volumes; SGaw = airway conductance; RMF = respiratory muscle function; SpO<sub>2</sub> = hemoglobin oxygen saturation by pulse oximetry; HR = heart rate; MAP = mean arterial blood pressure.

monary function in humans. The study investigated the effects of interpleural bupivacaine on respiratory muscles and lung function.

### Materials and Methods

#### Patients

After Institutional approval and informed consent, 13 healthy adults for whom the results of the respiratory tests were normal and who had no contraindications to subcostal cholecystectomy were included in the study. Subjects excluded from the study were those with abnormal chest anatomy; neurologic or cardiac disease; morbid obesity ( $\text{BMI} > 35 \text{ kg} \cdot \text{m}^{-2}$ ); known diabetes mellitus; coagulation disorders; or chronic pain.

#### Catheter Placement

Patients received no preanesthetic medication and were fasted overnight. After induction of anesthesia with the patient supine, a catheter (Perifix, Braun, Melsungen, Germany) was introduced through an 18-G (Hussey, Sherwood Medical, St. Louis, Mo.) needle. The needle was inserted into the space below the right scapular angle, and the catheter was inserted and was then withdrawn slowly until contrast could be seen on the skin surface. A 0.5% bupivacaine plus 1:200,000 epinephrine solution was administered to rule out intravascular injection. Radiographic control was performed to rule out the presence of pneumothorax. Intravenous contrast was not used, for two reasons: to avoid altering the distribution of bupivacaine and to avoid the risk of contrast-induced nephropathy.

## RESPIRATORY EFFECTS OF INTERPLEURAL BUPIVACAINE

Fig. 1. Sequence of the study. BP = breathing pattern; FS = forced spirometry (dynamic lung volumes); DLco = carbon monoxide diffusion; SLV = static lung volumes; SGaw = airway conductance; RMF = respiratory muscle function; SpO<sub>2</sub> = hemoglobin oxygen saturation by pulse oximetry; HR = heart rate; MAP = mean arterial blood pressure.

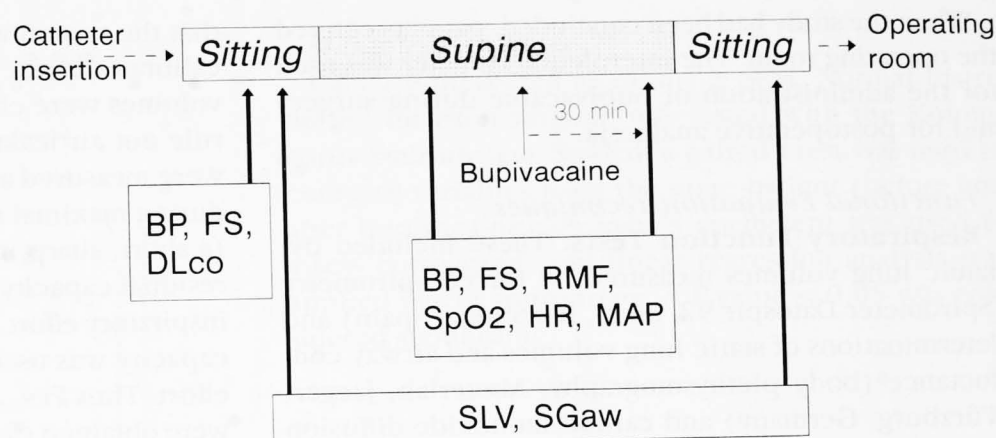

monary function in humans. The current study investigated the effects of interpleural bupivacaine on human respiratory muscles and lung function.

## Materials and Methods

### Patients

After Institutional approval and informed consent, 13 healthy adults for whom the results of respiratory function tests were normal and who were scheduled for subcostal cholecystectomy were consecutively included in the study. Subjects excluded were those with abnormal chest anatomy; neurologic, muscular, pulmonary or cardiac disease; morbid obesity (body mass index  $> 35 \text{ kg} \cdot \text{m}^{-2}$ ); known drug allergy; diabetes mellitus; coagulation disorders; or acute or chronic pain.

### Catheter Placement

Patients received no preanesthetic medication. Before surgery and with the patient sitting, an interpleural catheter (Perifix, Braun, Melsungen, Germany) was introduced through an 18-G Hustead-type needle (Monoject, Sherwood Medical, West Sussex, United Kingdom). The needle was inserted in the eighth intercostal space below the right scapular vertex, using the technique described by Scott.<sup>8</sup> The catheter was gently inserted and was then withdrawn so that the 10-cm mark could be seen on the skin surface. A test dose (3 ml 0.5% bupivacaine plus 1:200,000 epinephrine) was administered to rule out intravascular injection, and a radiographic control was performed to rule out the presence of pneumothorax. Interpleural radiologic contrast was not used, for two reasons: to avoid diluting or altering the distribution of bupivacaine and to pre-

vent any possible effect of the dye on respiratory muscle function.

### Experimental Protocol

Figure 1 describes the protocol used in this study. With the pleural catheter inserted and the patient sitting, breathing pattern, dynamic lung volumes (measured by forced spirometry), carbon monoxide diffusion, static lung volumes, and airway conductance were assessed.

The subjects were then placed supine, and 15 min later, breathing pattern, dynamic lung volumes, and respiratory muscle function were assessed. These parameters were again evaluated in the same position 30 min after administration of 20 ml 0.5% bupivacaine plus 1:200,000 epinephrine. To verify the extension and effectiveness of the analgesia, the pinprick test was performed, with the left hemithorax and superior hemiabdomen used as controls. The limits of cutaneous analgesia to be checked were as follows: cranially, a dermatome line between the clavicle and the nipple, related to the upper thoracic nerves<sup>9</sup>; caudally, the T10 dermatome related to the umbilical line<sup>9</sup>; and medially, the midline.

Static lung volumes and airway conductance were assessed after the interpleural blockade with the patients seated and were compared with the previous data obtained in the same position. They were not obtained in the supine position because plethysmography needed to be performed while the patient was sitting.

Hemoglobin saturation by pulse oximetry (Biox 3740, Ohmeda, Louisville, CO), heart rate, and non-invasive mean arterial blood pressure (Supermon 7210, Kontron Instruments, Milano, Italy) were monitored throughout the study. Patients breathed room air during the entire procedure.

When the study had been concluded, patients entered the operating room. The interpleural catheter was used for the administration of bupivacaine during surgery and for postoperative analgesia.

#### Functional Evaluation Techniques

**Respiratory Function Tests.** These included dynamic lung volumes measured by forced spirometry (Spirometer Datospir 92, Sibel, Barcelona, Spain) and determinations of static lung volumes and airway conductance (body plethysmography, Masterlab, Jaeger, Würzburg, Germany) and carbon monoxide diffusion (single-breath method, Masterlab). Reference values were those for a Mediterranean population.<sup>10,11</sup>

**Breathing Pattern.** Patients breathed through a mouthpiece and a two-way low-resistance valve (Hans-Rudolph, Kansas City, MO). Breathing pattern was obtained with a pneumotachometer (Screenmate, Jaeger) placed in the external inspiratory circuit. The flow signal was converted into a volume signal and registered with a multichannel recorder (R-611, Sensormedics, Anaheim, CA). Tidal volume, respiratory rate, minute ventilation, and inspiratory and total respiratory times were obtained from the recording. The system was calibrated at the beginning of each study. To ensure steady state, variables were evaluated after 5 min of quiet breathing.

**Respiratory Muscle Function.** Respiratory muscle function<sup>12</sup> was evaluated by determining maximal inspiratory and expiratory pressures measured at the mouth (P<sub>I</sub>max and P<sub>E</sub>max, respectively), at the esophagus (P<sub>es</sub><sub>sniff</sub> and P<sub>es</sub><sub>cough</sub>, respectively), and at the abdomen (P<sub>ga</sub><sub>sniff</sub> and P<sub>ga</sub><sub>cough</sub>, respectively); transdiaphragmatic pressure (P<sub>di</sub>) was computed as P<sub>ga</sub> - P<sub>es</sub>. The P<sub>I</sub>max was measured from the residual volume, and the P<sub>E</sub>max was determined from total lung capacity. Both efforts were performed against a closed mouthpiece, by using the same manometer (Sibelmed 63, Sibel). The P<sub>es</sub> and P<sub>ga</sub> were obtained with the classic two-balloon-catheter technique. The balloons (Jaeger) were the standard ones used to determine lung compliance. Each balloon's unstressed volume was 6 ml, and they were filled with the predetermined minimum air volume necessary to obtain the best recording. Thus, one balloon was placed in the esophagus and filled with 0.75 ml air, and the other was positioned in the stomach and filled with 1 ml. Each was attached to a pressure transducer (Transpac II, Abbot, Chicago, IL) that was connected to the above mentioned recorder. A pop test<sup>13</sup> previously performed confirmed

that the system was critically damped. The system was calibrated at the beginning of each study, and balloon volumes were checked at the end of the procedure to rule out air leakage. Mean values of P<sub>es</sub>, P<sub>ga</sub>, and P<sub>di</sub> were measured at tidal volume (P<sub>es</sub>, P<sub>ga</sub>, and P<sub>di</sub>) and during maximal respiratory efforts. The sniff maneuver (a short, sharp inspiratory nose effort from functional residual capacity) was chosen to evaluate the maximal inspiratory effort, and a voluntary cough from total lung capacity was used to evaluate the maximal expiratory effort. Thus P<sub>es</sub><sub>sniff</sub>, P<sub>ga</sub><sub>sniff</sub>, P<sub>di</sub><sub>sniff</sub>, P<sub>es</sub><sub>cough</sub>, and P<sub>ga</sub><sub>cough</sub> were obtained (figs. 2 and 3). All measurements, except sniff and cough maneuvers, were performed using nose clips.

Maximal respiratory measurements (P<sub>I</sub>max, P<sub>E</sub>max, forced spirometry, and sniff and cough measurements) were always conducted by the same physician and were randomly performed (with a standard random number table) to avoid interference from train-

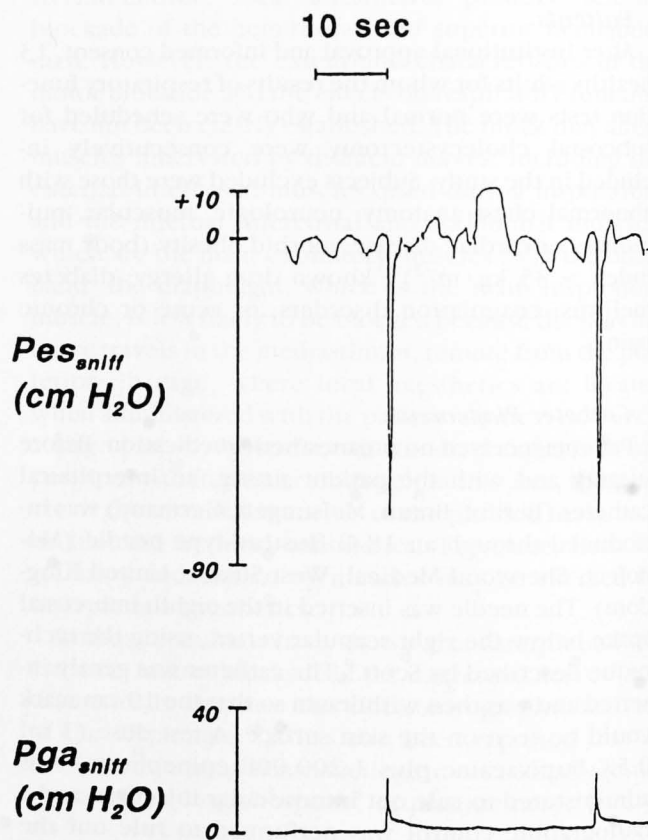

Fig. 2. Individual recording of maximal inspiratory efforts. P<sub>es</sub><sub>sniff</sub> = maximal inspiratory pressure at the esophagus; P<sub>ga</sub><sub>sniff</sub> = maximal inspiratory pressure at the abdomen.

Pes\_cough  
(cm H<sub>2</sub>O)

Pga\_cough  
(cm H<sub>2</sub>O)

Fig. 3. Individual recording of maximal expiratory pressures. P<sub>es</sub><sub>cough</sub> = maximal expiratory pressure at the esophagus; P<sub>ga</sub><sub>cough</sub> = maximal expiratory pressure at the abdomen.

ing or exhaustion. The best measurements was chosen in each case. P<sub>di</sub> were calculated by measuring the area under the pressure-volume curve with a semiautomatic integrator (Videoplan II, Zeiss, Kontro, Germany), to obtain the time. The speed of the recording was adjusted to allow an easier measurement of P<sub>di</sub> and P<sub>di</sub><sub>sniff</sub> were measured. P<sub>di</sub><sub>sniff</sub> and the tension-time index (P<sub>di</sub>/P<sub>di</sub><sub>sniff</sub> × inspiratory time) were calculated.



## RESPIRATORY EFFECTS OF INTERPLEURAL BUPIVACAINE

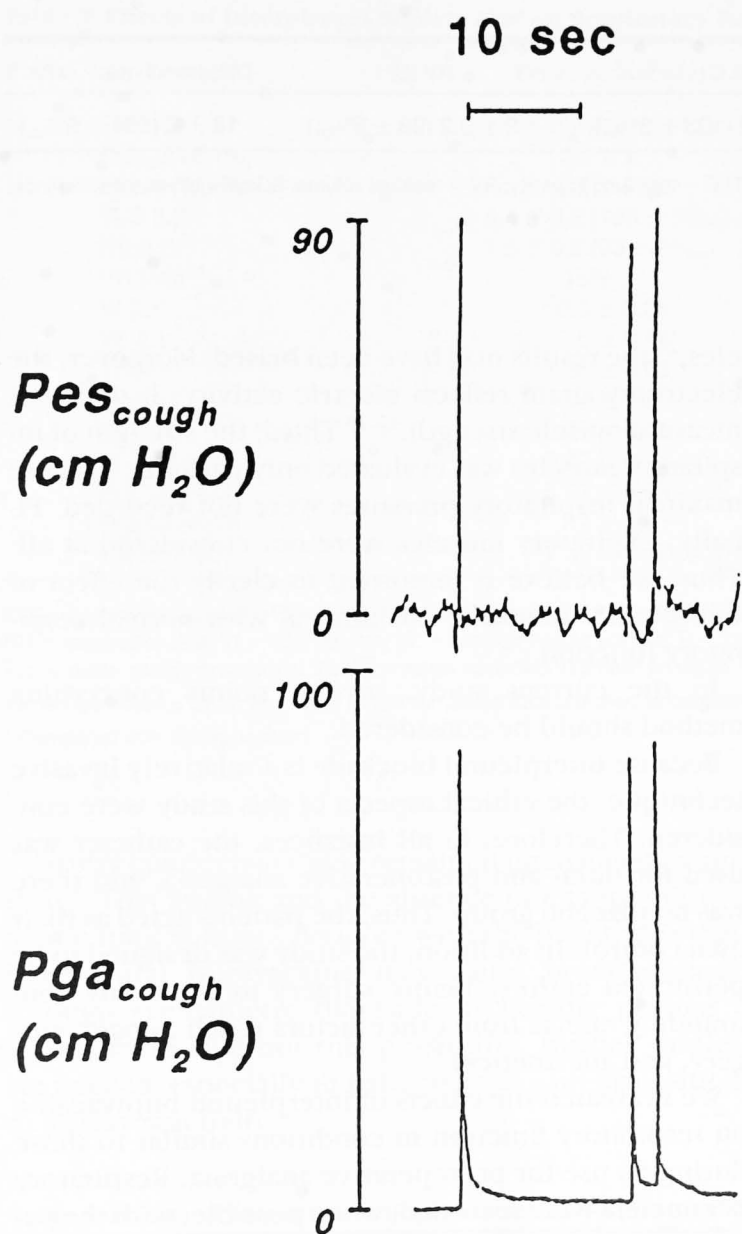

Fig. 3. Individual recording of maximal expiratory efforts.  $Pes_{cough}$  = maximal expiratory pressure at the esophagus;  $Pga_{cough}$  = maximal expiratory pressure at the abdomen.

ing or exhaustion. The best of three consecutive measurements was chosen in each case.  $\overline{Pes}$ ,  $\overline{Pga}$ , and  $\overline{Pdi}$  were calculated by measuring the area under their curve with a semiautomatic morphometric system (Videoplan II, Zeiss, Kontron Electronics Group, Eching, Germany), to obtain the mean pressure over time. The speed of the recording paper was increased to allow an easier measurement of the areas. After  $\overline{Pdi}$  and  $\overline{Pdi}_{sniff}$  were measured, their relation ( $\overline{Pdi}/\overline{Pdi}_{sniff}$ ) and the tension-time index of the diaphragm ( $\overline{Pdi}/\overline{Pdi}_{sniff} \times$  inspiratory time/total respiratory time) were calculated.

### Statistical Analysis

Data are presented as means  $\pm$  SEM. Normal distribution for each variable was tested with the Kolmogorov-Smirnov test. Student's paired *t* test was used to compare variables from the same patient (before and after bupivacaine). Pearson's coefficient was used to assess correlation, and linear regression analysis was applied where appropriate. A *P* value  $< 0.05$  was considered significant.

### Results

Demographic data of the subjects are listed in table 1. As previously mentioned, respiratory function was normal in all subjects at the beginning of the study (table 2). Unilateral skin analgesia of the thorax and superior abdomen within the limits previously mentioned was obtained in all the patients, without evidence of analgesia on the left side.

After the administration of bupivacaine, dynamic and static lung volumes, and airway conductance were unaltered. An increase in respiratory rate without changes in the other parameters of the breathing pattern was observed; this change caused an increase in minute ventilation (table 3).

In the comparison of variables that express inspiratory muscle strength, no changes were detected in  $\overline{PImax}$  and  $\overline{Pes}_{sniff}$ . However,  $\overline{Pdi}_{sniff}$  exhibited a slight decrease, which was entirely attributable to a decrease in  $\overline{Pga}_{sniff}$ ; a positive correlation between changes in these two variables was obtained ( $r = 0.84$ ;  $P < 0.001$ ).  $\overline{Pes}$  and  $\overline{Pga}$  during quiet breathing ( $\overline{Pes}$  and  $\overline{Pga}$ ) as well as the functional reserve of the diaphragm against fatigue ( $\overline{Pdi}/\overline{Pdi}_{sniff}$ , tension-time index of the diaphragm) remained unaltered (table 4).

Regarding expiratory muscle strength, no changes were observed in  $\overline{PEmax}$ . In contrast,  $\overline{Pga}_{cough}$  significantly decreased, and a similar pattern was observed in  $\overline{Pes}_{cough}$  (table 4).

Heart rate significantly increased ( $78 \pm 3$  to  $83 \pm 3$  beats/min;  $P < 0.01$ ) whereas mean arterial blood

Table 1. Demographic Data

| Age (yr)   | Sex (M/F) | Weight (kg) | Height (m)      | Body Mass Index ( $\text{kg} \cdot \text{m}^{-2}$ ) |
|------------|-----------|-------------|-----------------|-----------------------------------------------------|
| $55 \pm 4$ | 1/12      | $69 \pm 3$  | $1.53 \pm 0.02$ | $29 \pm 1$                                          |

Values are mean  $\pm$  SEM, where applicable.

Table 2. Preoperative Respiratory Function Tests (Sitting)

| FVC (L)                            | FEV <sub>1</sub> /FVC (%) | SGaw (1/kPa · s) | TLC (L)                             | RV (L)                             | DL <sub>co</sub> (mmol · min <sup>-1</sup> · kPa <sup>-1</sup> ) |
|------------------------------------|---------------------------|------------------|-------------------------------------|------------------------------------|------------------------------------------------------------------|
| 2.8 ± 0.2 (93 ± 3% <sub>pv</sub> ) | 80 ± 1.4                  | 0.8 ± 0.06       | 4.4 ± 0.2 (103 ± 3% <sub>pv</sub> ) | 1.5 ± 0.2 (93 ± 8% <sub>pv</sub> ) | 18 ± 7 (104 ± 5% <sub>pv</sub> )                                 |

FVC = forced vital capacity; FEV<sub>1</sub>/FVC = forced expiratory volume in 1 s/FVC ratio; TLC = total lung capacity; RV = residual volume; SGaw = airway conductance; DL<sub>co</sub> = carbon monoxide diffusion; %<sub>pv</sub> = % of the predicted value.

Values are mean ± SEM.

pressure decreased ( $98 \pm 4$  to  $90 \pm 3$  mmHg;  $P < 0.01$ ) after interpleural bupivacaine. The hemoglobin saturation remained unchanged ( $97 \pm 0.4$  vs.  $97 \pm 0.5\%$ ) throughout the study.

## Discussion

The current study demonstrates that the administration of interpleural bupivacaine to healthy patients in the supine position has no deleterious effects on pulmonary function or inspiratory muscle strength. The possibility of respiratory impairment induced by interpleural anesthetics has been suggested by several groups of investigators.<sup>4-6,14-19</sup> In this situation, maneuvers such as coughing and sighing would be altered and could result in a greater rate of pulmonary complications in the postoperative period.

Although some studies have evaluated respiratory function after the administration of interpleural anesthetics,<sup>16,19-22</sup> they are not useful enough to address this issue. All of these studies used only forced spirometry, which is not an appropriate method to diagnose muscle weakness caused by nerve blockade.<sup>12</sup> In addition, they were performed in the immediate postoperative period, and their results may have been influenced by pain, residual anesthetics or the surgery itself. Moreover, results differ among these studies, maintaining the controversy.

In a study in dogs<sup>4</sup> assessing the effects of interpleural bupivacaine on respiratory muscle function, diaphragmatic electromyographic activity was markedly diminished. However, this report had several limitations. First, the validity of the model may be questioned: upper abdominal surgery, which can induce diaphragm dysfunction,<sup>23</sup> was performed. In addition, there are important differences between dogs and humans in anatomic position and thorax shape.<sup>3</sup> Second, because only the electromyographic activity from the costal diaphragm was measured and because the crural and costal diaphragm are considered two different mus-

cles,<sup>24</sup> the results may have been biased. Moreover, the electromyogram reflects electric activity; it does not measure muscle strength.<sup>12,25</sup> Third, the strength of inspiratory muscles was evaluated only partially, because maximal inspiratory pressures were not recorded. Finally, expiratory muscles were not considered at all. Thus, we believe it important to clarify the effect of interpleural blockade on humans with normal respiratory function.

In the current study, several points concerning method should be considered.

Because interpleural blockade is a relatively invasive technique, the ethical aspects of this study were considered. Therefore, in all instances, the catheter was used for intra- and postoperative analgesia, and there was no placebo group. Thus, the patients acted as their own control. In addition, the study was designed to be performed entirely before surgery to avoid any confounding effects from other factors (such as pain, surgery, and anesthetics).

We evaluated the effects of interpleural bupivacaine on respiratory function in conditions similar to those during its use for postoperative analgesia. Respiratory parameters were recorded, when possible, with the patient supine, because the anesthetic is usually administered to supine patients, and patients remain supine in the postoperative period. Moreover, physiologic respiratory maneuvers (*i.e.*, cough) were used together with classic maneuvers. Finally, the volume and doses of local anesthetics were those most commonly used in clinical practice.

## Analysis of Results

Parameters from forced spirometry and static lung volumes did not change after interpleural bupivacaine. This finding is consistent with the hypothesis that there was no serious impairment in respiratory muscle function, although to support these results more specific indicators of respiratory muscle strength, such as maximal respiratory pressures,<sup>12</sup> were used.

Table 3. Effects of Interpleural Bupivacaine

| Parameter                 |
|---------------------------|
| FVC (L)                   |
| FEV <sub>1</sub> /FVC (%) |
| SGaw (1/(kPa · s))        |
| TLC (L)*                  |
| RV (L)*                   |
| RR (min <sup>-1</sup> )   |
| Vt (L)                    |
| VE (L)                    |
| Ti (s)                    |
| Ttot (s)                  |
| Ti/Ttot                   |
| Vt/Ti (L/s)               |
| Pes (cmH <sub>2</sub> O)  |
| Pga (cmH <sub>2</sub> O)  |
| Pdi (cmH <sub>2</sub> O)  |

FVC = forced vital capacity; FEV<sub>1</sub>/FVC = forced expiratory volume in 1 s/FVC ratio; SGaw = airway conductance; TLC = total lung capacity; RV = residual volume; RR = respiratory rate; Vt = tidal volume; VE = expiratory volume; Ti = inspiratory time; Ttot = total time; Pes = maximal inspiratory pressure; Pga = mean gastric pressure at Vt; Pdi = maximal diaphragmatic pressure.

Values are mean ± SEM. Student's *t* tests for comparison with sitting position.

Airway conductance also remained unchanged. This finding and the absolute static lung volumes disagree with the results of interpleural bupivacaine, which may be explained through sympathetic blockade. However, to rule out this possibility, further studies are needed, especially in patients with normal airway reactivity.

Table 4. Effects of Interpleural Bupivacaine

| Parameter                                 |
|-------------------------------------------|
| Inspiratory muscles                       |
| P <sub>imax</sub> (cmH <sub>2</sub> O)    |
| Pes <sub>sniff</sub> (cmH <sub>2</sub> O) |
| Pga <sub>sniff</sub> (cmH <sub>2</sub> O) |
| Pdi <sub>sniff</sub> (cmH <sub>2</sub> O) |
| Pdi/Pdi <sub>sniff</sub>                  |
| TTdi                                      |
| Expiratory muscles                        |
| PE <sub>max</sub> (cmH <sub>2</sub> O)    |
| Pes <sub>cough</sub> (cmH <sub>2</sub> O) |
| Pga <sub>cough</sub> (cmH <sub>2</sub> O) |

P<sub>imax</sub> = maximal inspiratory pressure (at mouth occlusion); Pes<sub>sniff</sub> = maximal inspiratory pressure (at mouth occlusion); Pga<sub>sniff</sub> = maximal gastric pressure (at mouth occlusion); Pdi<sub>sniff</sub> = maximal diaphragmatic pressure (at mouth occlusion); TTdi = total time of diaphragmatic contraction; PE<sub>max</sub> = maximal expiratory pressure (at mouth occlusion); Pes<sub>cough</sub> = maximal expiratory pressure (at mouth occlusion); Pga<sub>cough</sub> = mean gastric pressure (at mouth occlusion); Pdi<sub>cough</sub> = maximal diaphragmatic pressure (at mouth occlusion).

Values are mean ± SEM. Student's *t* tests for comparison with sitting position.

## RESPIRATORY EFFECTS OF INTERPLEURAL BUPIVACAINE

Table 3. Effects of Interpleural Bupivacaine on Respiratory Function (Supine)

| Parameter                 | Before Bupivacaine                  | After Bupivacaine                   | P Value |
|---------------------------|-------------------------------------|-------------------------------------|---------|
| FVC (L)                   | 2.6 ± 0.2 (87 ± 3% <sub>pv</sub> )  | 2.5 ± 0.2 (84 ± 3% <sub>pv</sub> )  | NS      |
| FEV <sub>1</sub> /FVC (%) | 80 ± 1                              | 78 ± 2                              | NS      |
| SGaw (1/(kPa · s))*       | 0.8 ± 0.06                          | 0.7 ± 0.08                          | NS      |
| TLC (L)*                  | 4.4 ± 0.2 (103 ± 3% <sub>pv</sub> ) | 4.5 ± 0.3 (103 ± 2% <sub>pv</sub> ) | NS      |
| RV (L)*                   | 1.5 ± 0.2 (93 ± 8% <sub>pv</sub> )  | 1.4 ± 0.2 (84 ± 9% <sub>pv</sub> )  | NS      |
| RR (min <sup>-1</sup> )   | 15 ± 1                              | 19 ± 1                              | <0.01   |
| Vt (L)                    | 0.5 ± 0.05                          | 0.48 ± 0.05                         | NS      |
| VE (L)                    | 7.6 ± 0.84                          | 8.9 ± 1                             | <0.05   |
| Ti (s)                    | 1.38 ± 0.08                         | 1.24 ± 0.07                         | <0.01   |
| Ttot (s)                  | 4 ± 0.3                             | 3.3 ± 0.2                           | <0.01   |
| Ti/Ttot                   | 0.35 ± 0.01                         | 0.38 ± 0.01                         | NS      |
| Vt/Ti (L/s)               | 0.37 ± 0.04                         | 0.41 ± 0.05                         | NS      |
| Pes (cmH <sub>2</sub> O)  | -5.62 ± 0.69                        | -5.23 ± 0.43                        | NS      |
| Pga (cmH <sub>2</sub> O)  | 1.7 ± 0.3                           | 1.44 ± 0.22                         | NS      |
| Pdi (cmH <sub>2</sub> O)  | 7.32 ± 0.77                         | 6.67 ± 0.51                         | NS      |

FVC = forced vital capacity; FEV<sub>1</sub>/FVC = forced expiratory volume in 1 s/FVC ratio; TLC = total lung capacity; RV = residual volume; SGaw = airway conductance; RR = respiratory rate; Vt = tidal volume; VE = expired minute volume; Ti = inspiratory time; Ttot = total respiratory time; Pes = mean esophageal pressure at Vt; Pga = mean gastric pressure at Vt; Pdi = mean transdiaphragmatic pressure at Vt; %<sub>pv</sub> = % of the predicted value; NS = not significant.

Values are mean ± SEM. Student's *t* tests for paired data are used to compare the parameters.

\* Compared with sitting position.

Airway conductance also remained unchanged in our study. This finding and the absence of changes in dynamic lung volumes disagree with the hypothesis that interpleural bupivacaine may cause bronchospasm through sympathetic blockade in healthy persons.<sup>5</sup> However, to rule out this possibility, further studies are needed, especially in patients with a predisposition to airway reactivity.

With reference to inspiratory muscles, P<sub>Imax</sub> and P<sub>es<sub>sniff</sub></sub> were unchanged after bupivacaine. However, P<sub>di<sub>sniff</sub></sub>, which specifically expresses the strength of the diaphragm, slightly decreased. This finding would indicate an impairment in the strength of this muscle. Nevertheless, the decrease in P<sub>di<sub>sniff</sub></sub> was caused completely by a decrease in P<sub>ga<sub>sniff</sub></sub>, and this parameter reflects the abdominal pressure changes attributable to

Table 4. Effects of Interpleural Bupivacaine on Respiratory Muscle Strength (Supine)

| Parameter                                            | Before Bupivacaine                 | After Bupivacaine                  | P Value |
|------------------------------------------------------|------------------------------------|------------------------------------|---------|
| Inspiratory muscles                                  |                                    |                                    |         |
| P <sub>Imax</sub> (cmH <sub>2</sub> O)               | -71 ± 7 (107 ± 10% <sub>pv</sub> ) | -67 ± 8 (99 ± 10% <sub>pv</sub> )  | NS      |
| P <sub>es<sub>sniff</sub></sub> (cmH <sub>2</sub> O) | -77.6 ± 5.2                        | -73.6 ± 5.1                        | NS      |
| P <sub>ga<sub>sniff</sub></sub> (cmH <sub>2</sub> O) | 24.2 ± 7.4                         | 18.4 ± 6.8                         | <0.05   |
| P <sub>di<sub>sniff</sub></sub> (cmH <sub>2</sub> O) | 102 ± 10                           | 92 ± 10                            | <0.05   |
| P <sub>di</sub> /P <sub>di<sub>sniff</sub></sub>     | 0.073 ± 0.005                      | 0.079 ± 0.009                      | NS      |
| TTdi                                                 | 0.026 ± 0.002                      | 0.029 ± 0.002                      | NS      |
| Expiratory muscles                                   |                                    |                                    |         |
| PE <sub>max</sub> (cmH <sub>2</sub> O)               | 104 ± 12 (74 ± 9% <sub>pv</sub> )  | 100 ± 13 (72 ± 10% <sub>pv</sub> ) | NS      |
| P <sub>es<sub>cough</sub></sub> (cmH <sub>2</sub> O) | 92 ± 13                            | 78 ± 10                            | 0.074   |
| P <sub>ga<sub>cough</sub></sub> (cmH <sub>2</sub> O) | 108 ± 10                           | 92 ± 8                             | <0.01   |

P<sub>Imax</sub> = maximal inspiratory pressure (at mouth); P<sub>es<sub>sniff</sub></sub> = maximal inspiratory esophageal pressure; P<sub>ga<sub>sniff</sub></sub> = maximal inspiratory gastric pressure; P<sub>di<sub>sniff</sub></sub> = maximal transdiaphragmatic pressure; P<sub>di</sub>/P<sub>di<sub>sniff</sub></sub> = transdiaphragmatic pressure at Vt/maximal transdiaphragmatic pressure ratio; TTdi = tension-time index of the diaphragm; PE<sub>max</sub> = maximal expiratory pressure (at mouth); P<sub>es<sub>cough</sub></sub> = maximal expiratory esophageal pressure; P<sub>ga<sub>cough</sub></sub> = maximal expiratory gastric pressure; %<sub>pv</sub> = % of the predicted value; NS = not significant.

Values are mean ± SEM. Student's *t* tests for paired data are used to compare the parameters.



the caudal displacement of the diaphragm. This decrease in  $P_{ga_{sniff}}$  may be related to increased abdominal compliance caused by the decreased motor tone. Because  $P_{Imax}$  and  $P_{es_{sniff}}$  remained unaltered and both parameters evaluate the global inspiratory muscle strength,<sup>26</sup> changes in  $P_{di_{sniff}}$  may be considered irrelevant regarding inspiratory function.

The tension-time index of the diaphragm also remained unchanged. Thus, the risk of diaphragmatic fatigue is not increased in healthy adults receiving interpleural bupivacaine. However, these results cannot be extrapolated to cases of patients at increased risk of diaphragmatic fatigue, such as patients with severe chronic obstructive pulmonary disease.

Maximal expiratory maneuvers also suggested that there was a degree of motor blockade of the abdominal wall muscles, manifested as a decreased  $P_{ga_{cough}}$ . Because abdominal expiratory effort is transmitted to the thorax,  $P_{es_{cough}}$  showed a trend to decrease. This finding appears to be clinically unimportant in healthy subjects because the magnitude of the changes was small and because  $P_{Emax}$ , which closely indicates the effective expulsive efforts performed with all the expiratory muscles, remained unmodified. However, these effects may be more important in patients with obstructive airways diseases, who frequently need the recruitment of abdominal muscles.

The increase in respiratory rate and minute ventilation after interpleural bupivacaine, without changes in the remaining parameters of the breathing pattern and hemoglobin saturation, was an unexpected result. It may be attributable to central ventilatory effects of the absorbed local anesthetic<sup>27</sup> or to the absorbed epinephrine. On the other hand, mean arterial blood pressure slightly decreased, perhaps because of the sympathetic blockade induced by bupivacaine<sup>15,28</sup> and the  $\beta$ -agonist effect of epinephrine,<sup>29</sup> which also may explain the increase in heart rate. None of these mechanisms could be confirmed in this study.

Our results demonstrate that the effects of interpleural bupivacaine on the respiratory system are minimal if given with the patient supine. However, when local anesthetics are given to patients in the lateral decubitus, a similar degree of analgesia is obtained,<sup>2</sup> but the safety of the technique in that position has not been clearly defined. In the lateral decubitus, the anesthetic spreads to the mediastinal pleural space,<sup>2</sup> where it may induce a blockade of the phrenic nerve, which is in contact with the mediastinal pleura.<sup>30,31</sup>

Finally, these results cannot be extrapolated to larger concentrations or volumes of bupivacaine or to continuous infusions.

In conclusion, interpleural bupivacaine, when administered preoperatively to healthy supine subjects, does not significantly impair lung or inspiratory muscle function. Bupivacaine produces a slight decrease in the strength of abdominal muscles, probably because of the motor block it induces. Although this impairment is small and does not reflect the effective expulsive pressures, its clinical relevance in the postoperative period remains unknown, especially in patients with respiratory or neuromuscular diseases.

The authors thank Dr. O. Pol and Dr. J. Vallès for their help with the statistical evaluation of the results.

## References

1. De Troyer A, Estenne M: Functional anatomy of the respiratory muscles. *Clin Chest Med* 9:175-193, 1988
2. Strömskag KE, Hauge O, Steen PA: Distribution of local anesthetics into the interpleural space, studied by computerized tomography. *Acta Anaesthesiol Scand* 34:323-326, 1990
3. Riegler FX, VadeBoncouer TR, Pelligrino DA: Interpleural anesthetics in the dog: Differential somatic neural blockade. *ANESTHESIOLOGY* 71:744-750, 1989
4. Kowalski SE, Bradley BD, Greengrass RA, Freedman J, Younes MK: Effects of interpleural bupivacaine (0.5%) on canine diaphragmatic function. *Anesth Analg* 75:400-404, 1992
5. Shantha TR: Unilateral bronchospasm after interpleural analgesia. *Anesth Analg* 74:291-293, 1992
6. Lauder GR: Interpleural analgesia and phrenic nerve paralysis. *Anaesthesia* 48:315-316, 1993
7. Buckley FP: Anesthesia and obesity and gastrointestinal disorders. *Clinical Anesthesia*. Edited by Barash PG, Cullen BF, Stoelting RK. Philadelphia, JB Lippincott, 1992, pp 1169-1183
8. Scott PV: Interpleural regional analgesia: Detection of the interpleural space by saline infusion. *Br J Anaesth* 66:131-133, 1991
9. Covino BG, Scott DB: *Handbook of Epidural Anesthesia and Analgesia*. Orlando, Grune & Stratton, 1985, p 25
10. Roca J, Sanchis J, Agusti-Vidal A, Segarra F, Navajas D, Rodriguez-Roisin R, Casan P, Sans S: Spirometric reference values for a Mediterranean population. *Bull Eur Physiopathol Respir* 22:217-224, 1986
11. Roca J, Rodriguez-Roisin R, Cobo E, Burgos F, Perez J, Clausen JL: Single breath carbon monoxide diffusing capacity (DLco) prediction equations for a Mediterranean population. *Am Rev Respir Dis* 141:1026-1032, 1990
12. Rochester DF: Tests of respiratory muscle function. *Clin Chest Med* 9:249-261, 1988
13. Bergel DH: Techniques in cardiovascular physiology: I. (P302) Measurement of blood pressure, *Techniques in the Life Sciences*. Edited by Linden RJ. County Clare, Elsevier, 1983, pp 1-18
14. Covino BG: Interpleural regional analgesia (editorial). *Anesth Analg* 67:427-429, 1988

15. McIlvaine WB, Knox RF, Fennesse: Continuous infusion of bupivacaine via intrapleural catheter after thoracotomy in children. *ANESTHESIOLOGY* 71:744-746, 1989
16. Oxorn DC, Whatley GS: Post-operative analgesia following interpleural bupivacaine. *Anaesth Intensive Care* 17:44-46, 1989
17. Aguilar J, Montero A, Lopez FV: Analgesia and phrenic nerve palsy (letter). *Anaesthesia* 48:315-316, 1993
18. Redick LF: Is phrenic block possible? (letter). *Reg Anesth* 13:44, 1990
19. VadeBoncouer TR, Riegler FX: Interpleural bupivacaine and saline on morphine requirement after cholecystectomy. *ANESTHESIOLOGY* 71:744-746, 1989
20. Frenette L, Boudreault D, Guay J: Does bupivacaine improve pulmonary function after cholecystectomy? (letter). *Reg Anesth* 13:44, 1990
21. Brismar B, Pettersson N, Tacklind L: Postoperative analgesia with interpleural bupivacaine-adrenaline. *Acta Anaesthesiol Scand* 34:323-326, 1990
22. Frank ED, McKay W, Rocco A, G: Bupivacaine for postoperative analgesia following cholecystectomy: A randomized prospective study. *Reg Anesth* 13:44, 1990

## RESPIRATORY EFFECTS OF INTERPLEURAL BUPIVACAINE

15. McIlvaine WB, Knox RF, Fennessey PV, Goldstein M: Continuous infusion of bupivacaine *via* intrapleural catheter for analgesia after thoracotomy in children. *ANESTHESIOLOGY* 69:261-264, 1988
16. Oxorn DC, Whatley GS: Post-cholecystectomy pulmonary function following interpleural bupivacaine and intramuscular pethidine. *Anaesth Intensive Care* 17:440-443, 1989
17. Aguilar J, Montero A, Lopez FV, Llamazares JF: Intrapleural analgesia and phrenic nerve palsy (letter). *Reg Anesth* 13:45, 1990
18. Redick LF: Is phrenic block possible with interpleural analgesia? (letter). *Reg Anesth* 13:44, 1990
19. VadeBoncouer TR, Riegler FX, Gautt RS, Weinberg GL: A randomized, double-blind comparison of the effects of interpleural bupivacaine and saline on morphine requirements and pulmonary function after cholecystectomy. *ANESTHESIOLOGY* 71:339-343, 1989
20. Frenette L, Boudreault D, Guay J: Interpleural analgesia improves pulmonary function after cholecystectomy. *Can J Anaesth* 38:71-74, 1991
21. Brismar B, Pettersson N, Tokics L, Strandberg A, Hedenstierna G: Postoperative analgesia with intrapleural administration of bupivacaine-adrenaline. *Acta Anaesthesiol Scand* 31:515-520, 1987
22. Frank ED, McKay W, Rocco A, Gallo JP: Interpleural bupivacaine for postoperative analgesia following cholecystectomy: A randomized prospective study. *Reg Anesth* 15:26-30, 1990
23. Simonneau G, Vivien A, Sartene R, Kustlinger F, Samii K, Noviant Y, Duroux P: Diaphragm dysfunction induced by upper abdominal surgery. *Am Rev Respir Dis* 128:899-903, 1983
24. De Troyer A, Sampson M, Sigrist S, Macklem PT: The diaphragm: Two muscles. *Science* 213:237-238, 1981
25. Aminoff MJ: Clinical electromyography, *Electrodiagnosis in Clinical Neurology*. Edited by Aminoff MJ. New York, Churchill Livingstone, 1986, pp 231-263
26. Laroche C, Mier A, Moxham J, Green M: The value of sniff oesophageal pressures in the assessment of global inspiratory muscle strength. *Am Rev Respir Dis* 138:598-603, 1988
27. Gross JB, Caldwell CB, Shaw LM, Laucks SO: The effect of lidocaine on the ventilatory response to carbon dioxide. *ANESTHESIOLOGY* 59:521-525, 1983
28. Strömskag KE, Minor B, Steen PA: Side effects and complications related to interpleural analgesia: An update. *Acta Anaesthesiol Scand* 34:473-477, 1990
29. Wood M: Drugs and the sympathetic nervous system, *Drugs and Anaesthesia*. Edited by Wood M, Wood AJJ. Baltimore, Williams & Wilkins, 1990, pp 390-391
30. Testut L, Latarjet A: *Anatomía Humana*. Volume III. Barcelona, Salvat S.A., 1979, p 1008
31. Gallart L, Gea J, Samsó E, Broquetas JM, Puig MM: Interpleural analgesia, phrenic nerve paralysis and patient position (letter). *Anaesthesia* 49:175, 1994
